# Supplementary material
Source: publisher site journal article supplement (https://www.dovepress.com/article/290348)
Supplement: Supplementary file 1 [file get_supplementary_file.php]

**Supplementary table 1: Baseline characteristics of 145 colorectal cancer patients**

| Characteristics                   | Value , <i>n</i> (%) |
|-----------------------------------|----------------------|
| Gender                            |                      |
| Male                              | 97 (66.90)           |
| Female                            | 48 (33.10)           |
| Age                               |                      |
| Mean±SD                           | 65.52±12.97          |
| Median, <i>n</i> ( <i>range</i> ) | 66(32-90)            |
| Tumor size                        |                      |
| Mean±SD                           | 5.48±1.96            |
| Median, <i>n</i> ( <i>range</i> ) | 5.5(0.6-14)          |
| T stage                           |                      |
| pT1-2                             | 13 (8.97)            |
| pT3-4                             | 132 (91.03)          |
| N stage                           |                      |
| pN0                               | 85 (58.62)           |
| pN1-2                             | 60 (41.38)           |
| M stage                           |                      |
| pM0                               | 136 (93.79)          |
| pM1                               | 9 (6.21)             |
| pTNM stage                        |                      |
| Stages I–II                       | 82 (56.55)           |
| Stages III–IV                     | 63 (43.45)           |
| Differentiation degree            |                      |
| G1–2                              | 98 (67.59)           |
| G3                                | 47 (32.41)           |
| Perineural invasion               |                      |
| No                                | 133 (91.72)          |
| Yes                               | 12 (8.28)            |
| Pathological type                 |                      |
| Mucous adenocarcinoma             | 19 (13.10)           |
| No Mucous adenocarcinoma          | 126 (8.4)            |

T stage, invasion depth.; N stage, lymph node metastasis; M stage, Distant metastasis; pTNM, pathological TNM;

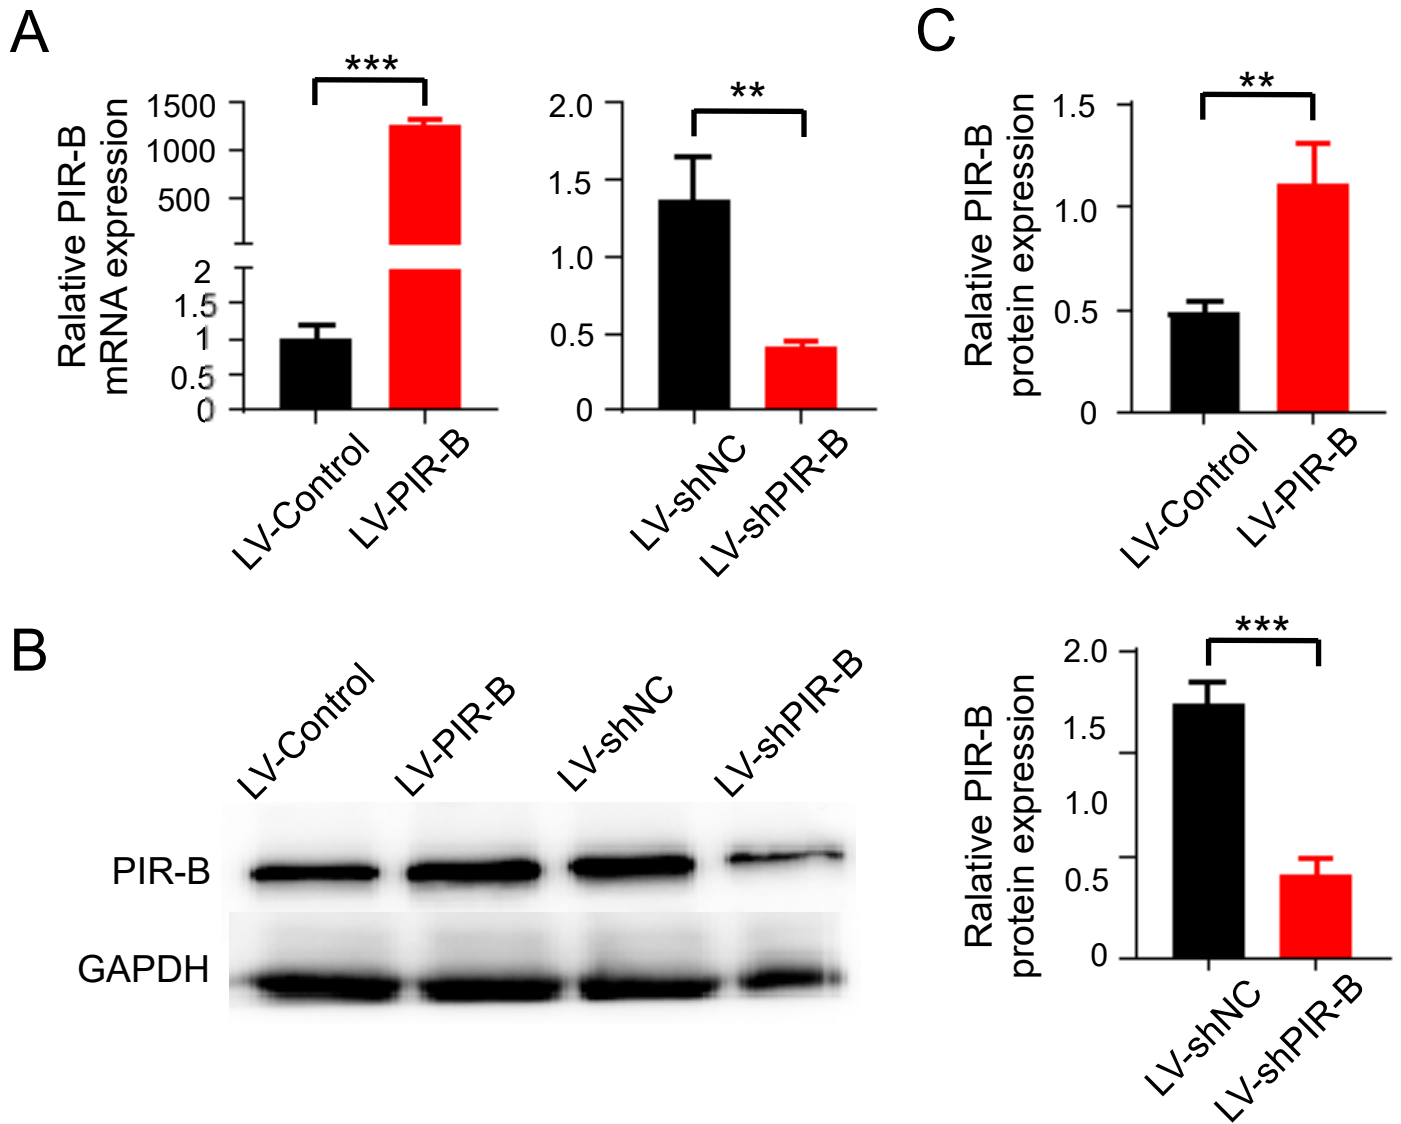

**Supplementary Figure** Detection of PIR-B expression in MC38 cell line by RT-PCR and Western blotting

(A) mRNA expression levels of PIR-B were detected by RT-PCR following transfection with lentiviral vector

(B,C) Overexpression and Knockdown of PIR-B via lentivirus were detected in protein levels using Western blotting
